# Supplementary material for: Metal–organic framework (MOF)-derived hollow hybrid Cu2O/Cu/Au for non-enzymatic H2O2 sensing
Source: Royal Society of Chemistry journal article supplement (doi:10.1039/d2ce01135b), 2022-01-01
Supplement: d2ce01135b1.pdf [file d2ce01135b1.pdf]

## Supporting Information

### Metal-organic framework (MOF)-derived hollow hybrid $\text{Cu}_2\text{O}/\text{Cu}/\text{Au}$ for non-enzymatic $\text{H}_2\text{O}_2$ sensing

Huan Chen,<sup>a</sup> Lei Shao,<sup>a</sup> Junchao Ma,<sup>a</sup> Jun Zhou<sup>b</sup> and Yu Fu<sup>\*a</sup>

Department of chemistry, College of Sciences, Northeastern University, Shenyang

110819, P. R. China.

Corresponding author: Yu Fu, Email: fuyu@mail.neu.edu.cn

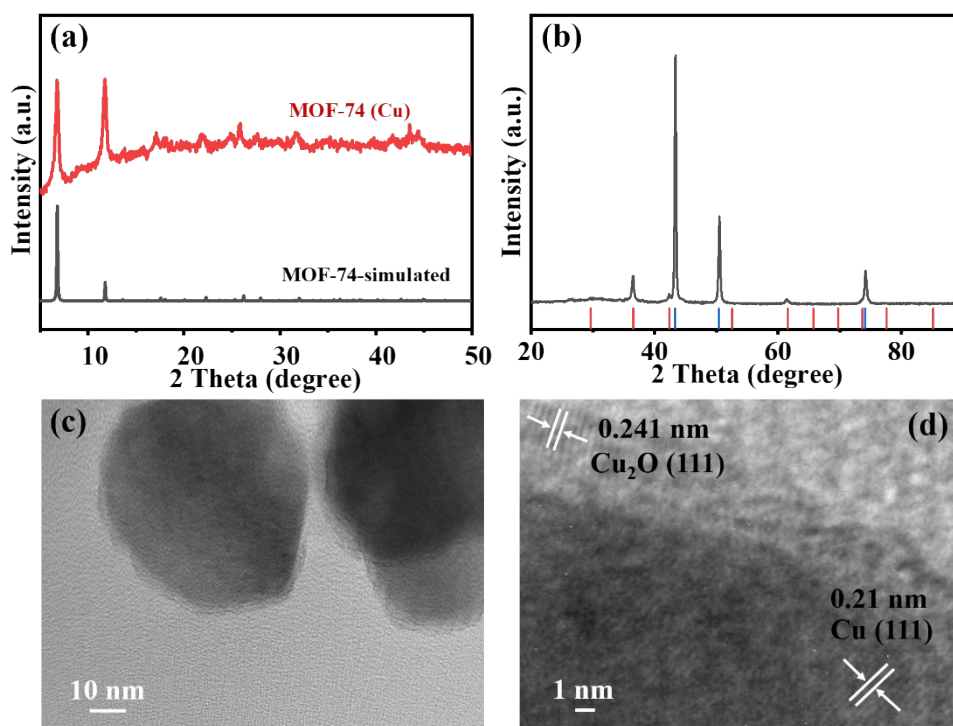

Figure S1. (a) PXRD patterns of MOF-74-simulated and MOF-74 (Cu); (b) PXRD pattern of  $\text{Cu}_2\text{O}/\text{Cu}/\text{Au}$ , standard PDF cards of  $\text{Cu}_2\text{O}$  (red vertical lines) and Cu (blue vertical lines); (c) TEM image of  $\text{Cu}_2\text{O}/\text{Cu}$ ; (d) HRTEM image of  $\text{Cu}_2\text{O}/\text{Cu}$ .

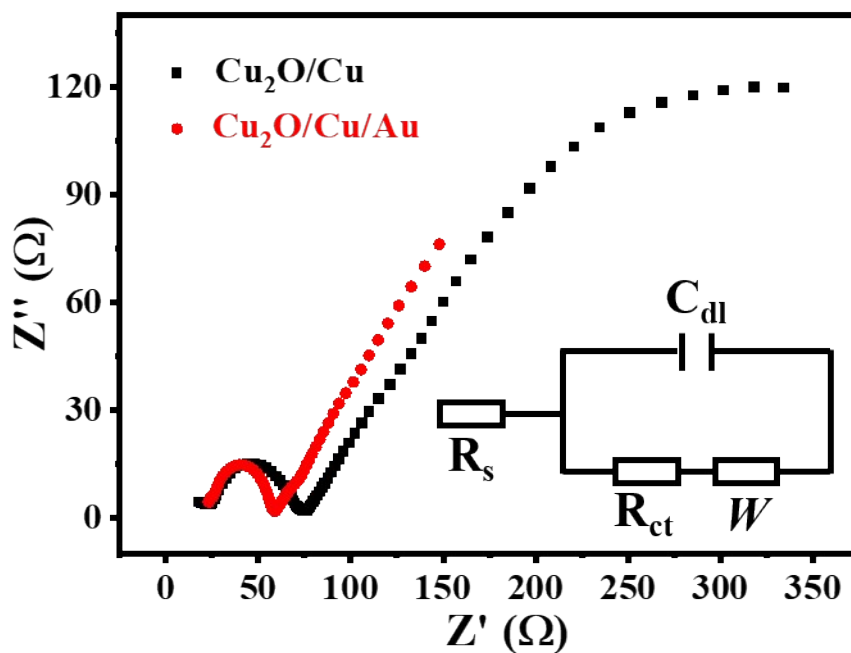

Figure S2. Nyquist plots of  $\text{Cu}_2\text{O}/\text{Cu}$ -modified GCE and  $\text{Cu}_2\text{O}/\text{Cu}/\text{Au}$ -modified GCE in the presence of 0.1 M  $\text{K}_3\text{Fe}(\text{CN})_6/\text{K}_4\text{Fe}(\text{CN})_6$  with 0.1 M KCl solution. The equivalent circuit used to fit the EIS response is shown in the insert.

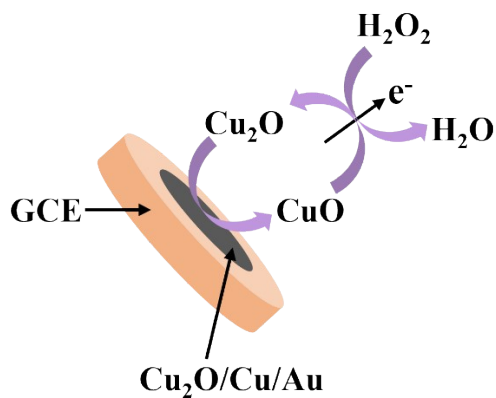

Figure S3. The schematic diagram of the catalytic mechanism for the reduction of  $\text{H}_2\text{O}_2$  by  $\text{Cu}_2\text{O}/\text{Cu}/\text{Au}$  electrode

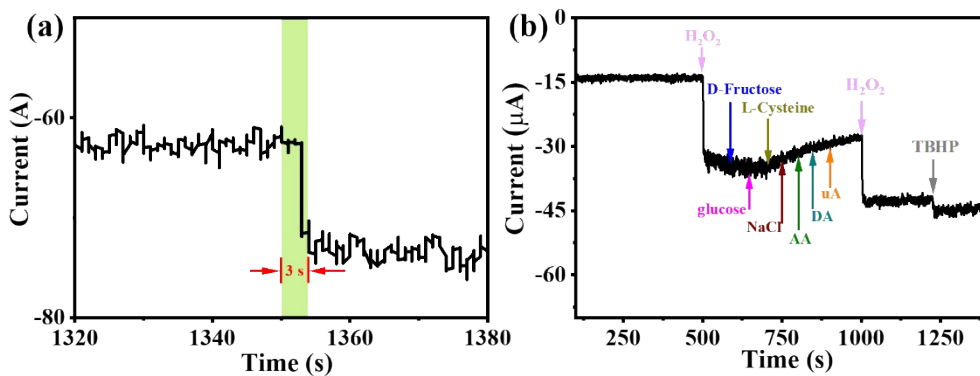

Figure S4. (a) The response time of  $\text{Cu}_2\text{O}/\text{Cu}/\text{Au}$  toward  $\text{H}_2\text{O}_2$ ; (b) the anti-interference and selectivity toward  $\text{H}_2\text{O}_2$  of  $\text{Cu}_2\text{O}/\text{Cu}/\text{Au}$ .

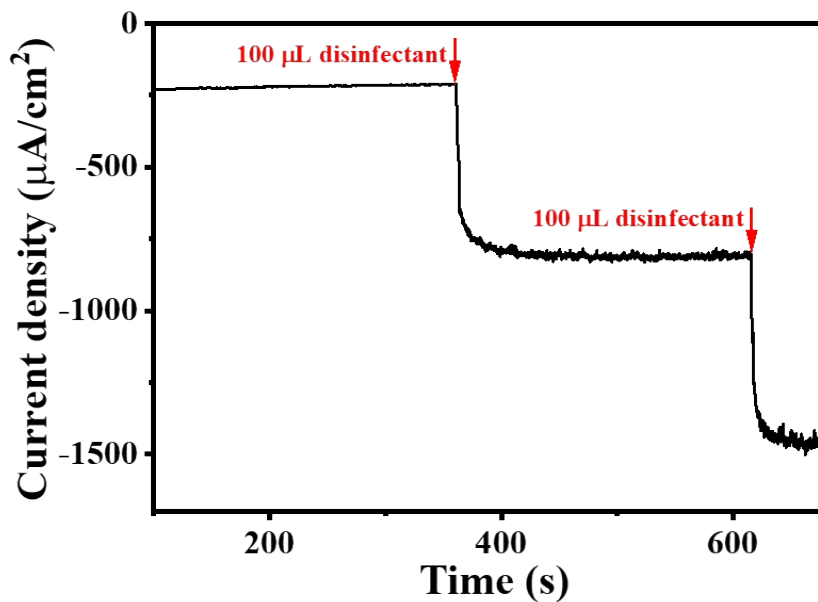

Figure S5. The response current density of hollow  $\text{Cu}_2\text{O}/\text{Cu}/\text{Au}$  toward disinfectant.
